# Supplementary material for: Appraisal of the causal effect of plasma caffeine on adiposity, type 2 diabetes, and cardiovascular disease: two sample mendelian randomisation study
Source: BMJ Med. 2023 Jan 31;2(1):e000335. doi: 10.1136/bmjmed-2022-000335 (PMC9978685; doi:10.1136/bmjmed-2022-000335)
Supplement: online supplemental file 1 [file bmjmed-2022-000335supp001.xlsx]

## Sheet: ST1
Supplemental table 1. Study characteristics
Phenotype	Consortium or study	First author	Cases	Noncases/sample size	Ancestry	ICD-10 code	FinnGen phenotype	Adjustments
Body mass index	GIANT (Genetic Investigation of ANthropometric Traits)	Yengo	NA	681 275	European	NA	NA
Whole body fat mass	UK Biobank	Ben Elsworth	NA	454 137	European	NA	NA
Whole body fat-free mass	UK Biobank	Ben Elsworth	NA	454 850	European	NA	NA
Type 2 diabetes	FinnGen	FinnGen	44 266	256 217	European	NA	E4_DM2_STRICT	Age, sex, genotyping batch, 10 PCs
Type 2 diabetes	DIAMANTE (DIAbetes Meta-ANalysis of Trans-Ethnic association studies)	Mahajan	74 124	824 006	European	NA	NA	Age, sex, array, 6 PCs
Ischemic heart disease	FinnGen	FinnGen	49 030	260 124	European	I20-I25	I9_ISCHHEART	Age, sex, genotyping batch, 10 PCs
Ischemic heart disease	CARDIoGRAMplusC4D and UK Biobank	van der Harst	122 733	424 528	Mixed	I20-I25	NA	Age, sex, 30 PCs
Atrial fibrillation	FinnGen	FinnGen	34 748	157 457	European	I48	I9_AF	Age, sex, genotyping batch, 10 PCs
Atrial fibrillation	AFGen, UK Biobank, Nord-Trøndelag Health Study, deCODE, Michigan Genomics Initiative, DiscovEHR	Nielsen	60 620	970 216	European	I48, I42, I25.5	NA	Birth year, sex, genotyping batch, 4 PCs
Heart failure	FinnGen	FinnGen	19 676	272 371	European	I11.0, I13.0, I13.2, I50	I9_HEARTFAIL	Age, sex, genotyping batch, 10 PCs
Heart failure	HERMES (Heart Failure Molecular Epidemiology for Therapeutic Targets)	Shah	47 309	930 014	European	I50	NA	Age, sex, genotyping array, 10 PCs
Stroke	FinnGen	FinnGen	20 029	280 171	European	I60, I61, I63, I64	I9_STR_SAH	Age, sex, genotyping batch, 10 PCs
Stroke	MEGASTROKE	Malik	40 585	406 111	European	I61, I63, I64	NA
NA=not available; PCs, principal components

## Sheet: ST2
Supplemental table 2. Summary level genetic associations of the two instrumental variables for plasma caffeine with the studied outcomes
					SNP-caffeine association			SNP-outcome association
Outcome	Consortium or study	SNP	Gene	EA	Beta	P value		Beta	SE	P value
Body mass index	GIANT	rs2472297	CYP1A2	C	0.1497	1e-20		-0.0122	0.0019	1.4e-10
Body mass index	GIANT	rs4410790	AHR	T	0.1091	1.8e-13		-0.0099	0.0018	4.1e-08
Whole-body fat mass	UK Biobank	rs2472297	CYP1A2	C	0.1497	1e-20		-0.008883	0.002219	6.2e-05
Whole-body fat mass	UK Biobank	rs4410790	AHR	T	0.1091	1.8e-13		-0.007278	0.002025	0.00033
Whole-body fat-free mass	UK Biobank	rs2472297	CYP1A2	C	0.1497	1e-20		-0.002136	0.001411	0.13
Whole-body fat-free mass	UK Biobank	rs4410790	AHR	T	0.1091	1.8e-13		-0.000395	0.001286	0.76
Type 2 diabetes	FinnGen	rs2472297	CYP1A2	C	0.1497	1e-20		-0.0325966	0.008914	0.000255
Type 2 diabetes	FinnGen	rs4410790	AHR	T	0.1091	1.8e-13		-0.0363187	0.008199	9.44e-06
Type 2 diabetes	DIAMANTE	rs2472297	CYP1A2	C	0.1497	1e-20		-0.022	0.0074	0.003
Type 2 diabetes	DIAMANTE	rs4410790	AHR	T	0.1091	1.8e-13		-0.022	0.0066	0.001
Ischemic heart disease	FinnGen	rs2472297	CYP1A2	C	0.1497	1e-20		-0.0057897	0.0092566	0.532
Ischemic heart disease	FinnGen	rs4410790	AHR	T	0.1091	1.8e-13		-0.017843	0.0084642	0.035
Ischemic heart disease	CARDIoGRAMplusC4D+UKBB	rs2472297	CYP1A2	C	0.1497	1e-20		0.00522064	0.00811	0.52
Ischemic heart disease	CARDIoGRAMplusC4D+UKBB	rs4410790	AHR	T	0.1091	1.8e-13		-0.0183506	0.00719	0.011
Atrial fibrillation	FinnGen	rs2472297	CYP1A2	C	0.1497	1e-20		-0.0049659	0.012729	0.696
Atrial fibrillation	FinnGen	rs4410790	AHR	T	0.1091	1.8e-13		-0.0148482	0.0116514	0.203
Atrial fibrillation	6 studies	rs2472297	CYP1A2	C	0.1497	1e-20		0.0062	0.0077	0.426
Atrial fibrillation	6 studies	rs4410790	AHR	T	0.1091	1.8e-13		-0.0095	0.0069	0.167
Heart failure	FinnGen	rs2472297	CYP1A2	C	0.1497	1e-20		0.0114588	0.0131276	0.382
Heart failure	FinnGen	rs4410790	AHR	T	0.1091	1.8e-13		-0.0042543	0.0119767	0.722
Heart failure	HERMES	rs2472297	CYP1A2	C	0.1497	1e-20		0.0056	0.0091	0.537
Heart failure	HERMES	rs4410790	AHR	T	0.1091	1.8e-13		-0.004	0.0082	0.626
Stroke	FinnGen	rs2472297	CYP1A2	C	0.1497	1e-20		-0.0008518	0.0125116	0.946
Stroke	FinnGen	rs4410790	AHR	T	0.1091	1.8e-13		0.0013542	0.0114339	0.907
Stroke	MEGASTROKE	rs2472297	CYP1A2	C	0.1497	1e-20		-0.0031	0.0113	0.785
Stroke	MEGASTROKE	rs4410790	AHR	T	0.1091	1.8e-13		-0.0039	0.0096	0.682

## Sheet: ST3
Supplemental table 3. Mendelian randomization analyses investigating the effect of body mass index on type 2 diabetes liability, used for mediation analysis. The Egger intercept was -0.0016, with standard error 0.0023 and p-value 0.474. The mean F-statistic was 73. Mendelian randomization (MR) estimates are in log odds ratio units.
Method	Number of SNPs	MR estimate	MR standard error	MR P value	Cochrane Q	Cochrane Q P value
Inverse variance weighted	483	0.945595	0.0534276	4.29663e-70	5691.59	<0.001
MR Egger	483	1.03932	0.141332	8.36213e-13	5685.52	<0.001
Weighted median	483	0.999385	0.0323849	4.16993e-209	NA	NA
Weighted mode	483	1.05553	0.0749461	5.63432e-38	NA	NA

## Sheet: ST4
Supplemental table 4. Genome-wide significant associations of the instrument at CYP1A2 (rs2472297) identified in the MR-Base curated database. EA: effect allele; ID: identifier.
Phenotype	ID in MR-Base	EA	Sample_n	Beta	SE	P-value
Coffee intake	ukb-b-5237	C	428860	-0.0464708	0.00182733	1.09901e-142
Tea intake	ukb-b-6066	C	447485	-0.0533453	0.00240098	2.30144e-109
Water intake	ukb-b-14898	C	427588	0.0334187	0.00205714	2.39994e-59
Creatinine	ukb-d-30700_irnt	C	344104	0.026231	0.002188	4.15145e-33
Hot drink temperature	ukb-b-14203	C	457873	0.0153851	0.00134465	2.60016e-30
Creatinine (enzymatic) in urine	ukb-a-333	C	327525	0.027145	0.00259658	1.41579e-25
Urate	ukb-d-30880_raw	C	343836	1.8062	0.18521	1.81552e-22
Urate	ukb-d-30880_irnt	C	343836	0.022316	0.0022953	2.44006e-22
Urea	ukb-d-30670_irnt	C	344052	0.025064	0.0025914	3.98841e-22
Urinary albumin excretion	ebi-a-GCST006586	C	382500	-0.0181241	0.00187956	5.30518e-22
Urea	ukb-d-30670_raw	C	344052	0.033475	0.0036325	3.12248e-20
Creatinine	ukb-d-30700_raw	C	344104	0.38844	0.042336	4.52585e-20
Coffee type: Ground coffee	ukb-d-1508_3	C	283449	-0.0111042	0.00125194	7.38074e-19
Platelet distribution width	ukb-d-30110_irnt	C	350470	0.0229679	0.0026677	7.36038e-18
Cereal intake	ukb-b-15926	C	441640	0.0158518	0.00202189	4.49987e-15
Drinking water intake	ukb-b-3975	C	64949	0.0983574	0.0125998	5.90065e-15
Phosphate	ukb-d-30810_raw	C	314658	-0.0034233	0.00044126	8.65964e-15
Phosphate	ukb-d-30810_irnt	C	314658	-0.021282	0.0027474	9.48855e-15
Sodium in urine	ukb-a-335	C	326831	0.0202887	0.00266973	2.97989e-14
Cystatin C	ukb-d-30720_irnt	C	344264	0.018657	0.0024587	3.25537e-14
Impedance of arm (right)	ukb-b-7859	C	454826	0.0109228	0.00159535	7.59976e-12
Leg fat percentage (right)	ukb-b-20531	C	454854	-0.00973564	0.00144946	1.9002e-11
Filtered coffee intake	ukb-b-748	C	64949	-0.0504943	0.00760413	3.10027e-11
Leg fat percentage (left)	ukb-b-18377	C	454826	-0.00946539	0.00143098	3.69999e-11
Diastolic blood pressure	ieu-b-39	C	724537	0.1321	0.0201	5.39014e-11
Body mass index	ieu-b-40	C	786480	-0.0122	0.0019	1.40001e-10
Cystatin C	ukb-d-30720_raw	C	344264	0.0028049	0.00043915	1.69309e-10
Peak expiratory flow	ebi-a-GCST007430	C	321047	0.0176	0.0029	7.00003e-10
Coffee consumed	ukb-b-9508	C	64949	-0.017741	0.00288014	7.29995e-10
Impedance of arm (left)	ukb-b-19379	C	454850	0.00980882	0.00160114	8.99995e-10
Mean platelet volume	ukb-d-30100_irnt	C	350470	0.0163201	0.00269537	1.40676e-09
Leg fat percentage (left)	ukb-a-278	C	331278	-0.0101481	0.00171466	3.25349e-09
Body mass index (BMI)	ukb-b-2303	C	454884	-0.0133901	0.00226263	3.29997e-09
Body mass index (BMI)	ukb-b-19953	C	461460	-0.0132573	0.00224581	3.59998e-09
Instant coffee intake	ukb-b-930	C	64949	-0.0731185	0.0124719	4.60002e-09
Leg fat percentage (right)	ukb-a-274	C	331296	-0.010068	0.00173665	6.74171e-09
Impedance of arm (right)	ukb-a-272	C	331279	0.0111775	0.00192836	6.78297e-09
Peak expiratory flow	ukb-b-12019	C	421986	0.0120534	0.00208334	7.19996e-09

## Sheet: ST5
Supplemental table 5. Genome-wide significant associations of the instrument at AHR (rs4410790) identified in the MR-Base curated database. EA: effect allele; ID: identifier.
Phenotype	ID in MR-Base	EA	Sample_n	Beta	SE	P-value
Coffee intake	ukb-b-5237	T	428860	-0.039	0.00167288	1.1995e-120
Tea intake	ukb-b-6066	T	447485	-0.04055	0.00219507	3.40017e-76
Water intake	ukb-b-14898	T	427588	0.0308714	0.00187689	8.60003e-61
Total bilirubin	ukb-d-30840_irnt	T	342829	0.030102	0.0023888	2.12129e-36
Total bilirubin	ukb-d-30840_raw	T	342829	0.12041	0.010769	5.05126e-29
Urinary albumin excretion	ebi-a-GCST006586	T	382500	-0.017982	0.00172991	2.63027e-25
Direct bilirubin	ukb-d-30660_irnt	T	292933	0.026084	0.0025942	8.81861e-24
Hot drink temperature	ukb-b-14203	T	457873	0.0109577	0.0012289	4.79954e-19
Creatinine (enzymatic) in urine	ukb-a-333	T	327525	0.0210338	0.00238895	1.31947e-18
Creatinine	ukb-d-30700_irnt	T	344104	0.017705	0.0020137	1.47197e-18
Direct bilirubin	ukb-d-30660_raw	T	292933	0.019278	0.0022565	1.30918e-17
Triglycerides	ieu-b-111	T	NA	-0.0150108	0.00205858	3.10027e-13
Urea	ukb-d-30670_irnt	T	344052	0.017331	0.0023846	3.65679e-13
Coffee consumed	ukb-b-9508	T	64949	-0.0187674	0.00262075	8.00018e-13
Ease of skin tanning	ukb-b-533	T	453065	-0.0145954	0.00207968	2.19989e-12
Sodium in urine	ukb-a-335	T	326831	0.0168706	0.00245638	6.51929e-12
Filtered coffee intake	ukb-b-748	T	64949	-0.0469734	0.0069188	1.10002e-11
Phosphate	ukb-d-30810_irnt	T	314658	-0.017072	0.0025286	1.4669e-11
Triglycerides	ukb-d-30870_irnt	T	343992	-0.016122	0.0024104	2.25996e-11
Phosphate	ukb-d-30810_raw	T	314658	-0.0027126	0.00040612	2.40602e-11
Urea	ukb-d-30670_raw	T	344052	0.021229	0.0033427	2.14551e-10
Instant coffee intake	ukb-b-930	T	64949	-0.072059	0.0113479	2.19999e-10
Drinking water intake	ukb-b-3975	T	64949	0.0705369	0.0114658	7.69999e-10
Coffee type: Ground coffee	ukb-d-1508_3	T	283449	-0.00705138	0.00115885	1.16767e-09
Cereal intake	ukb-b-15926	T	441640	0.0109143	0.00184697	3.40001e-09
Potassium in urine	ukb-a-334	T	326816	0.014906	0.00253319	4.0012e-09
Albumin	ukb-d-30600_irnt	T	315268	-0.015033	0.0025572	4.14085e-09
Low-density lipoprotein cholesterol	ebi-a-GCST90002412	T	431167	-0.0115969	0.00198659	5.30005e-09
Creatinine	ukb-d-30700_raw	T	344104	0.22608	0.038961	6.5286e-09
Albumin	ukb-d-30600_raw	T	315268	-0.0387	0.0066814	6.95136e-09
Glycated haemoglobin	ukb-d-30750_irnt	T	344182	-0.013764	0.0023891	8.36123e-09
Alkaline phosphatase	ukb-d-30610_irnt	T	344292	0.013901	0.0024179	8.9714e-09
High-density lipoprotein cholesterol	ieu-b-109	T	NA	0.0110264	0.0019761	2.39999e-08
Triglycerides	ukb-d-30870_raw	T	343992	-0.013881	0.0024905	2.49983e-08
Tea intake	ukb-e-1488_CSA	T	NA	0.0614	0.01103	2.58899e-08
Sex-hormone binding globulin adjusted for BMI	ebi-a-GCST90012108	T	180094	-0.00582987	0.00119725	4e-08
Body mass index	ieu-b-40	T	692517	-0.0099	0.0018	4.09996e-08
